# Supplementary material for: GAM-7: an organic–inorganic hybrid layered aluminophosphate crystal formed by zeolite transformation
Source: Royal Society of Chemistry journal article supplement (doi:10.1039/d4dt00751d), 2024-01-01
Supplement: d4dt00751d1.pdf [file d4dt00751d1.pdf]

## GAM-7: An Organic-Inorganic Hybrid Layered Aluminophosphate Crystal Formed by Zeolite Transformation

Kenichi Komura,<sup>1,2\*</sup> Gensuke Nakai,<sup>1</sup> Soki Shimizu,<sup>2</sup> Matsuri Nomura,<sup>1</sup> Shiori Niwa,<sup>2</sup> Sanae Kagari,<sup>1</sup> Kazuma Oka,<sup>1</sup> Edo Imai,<sup>1</sup> Hisakazu Aoki,<sup>1</sup> and Takuji Ikeda<sup>3\*</sup>

<sup>1</sup> *Department of Materials Science and Processing, Graduated School of Natural Science and Technology, Gifu University, Yanagido 1-1, Gifu 501-1193, Japan.*

<sup>2</sup> *Department of Chemistry and Biomolecular Science, Faculty of Engineering, Gifu University, Yanagido 1-1, Gifu 501-1193, Japan.*

<sup>3</sup> *National Institute of Advanced Industrial Science and Technology (AIST), 4-2-1 Nigatake, Sendai 983-8551, Japan.*

\*Corresponding authors

K. Komura, komura.kenichi.x4@f.gifu-u.ac.jp

T. Ikeda, takuji-ikeda@aist.go.jp

## EXPERIMENTAL

### Characterizations

Powder X-ray diffraction (XRD) diagrams (Shimadzu XRD-6000) were measured using Cu K $\alpha$  radiation ( $\lambda = 1.5418$  Å). Elemental analyses were performed using X-ray fluorescence spectroscopy (XRF; Bruker S8 TIGER). Nitrogen adsorption isotherm measurements were performed using an absorption analyzer (Bel Japan Belsorp 28SA), and ammonia temperature-programmed desorption (NH<sub>3</sub>-TPD) experiments were conducted on a TPD-66 apparatus (Bel Japan): the sample was evacuated at 400°C for 1 h, and ammonia was adsorbed at 100°C followed by further evacuation for 1 h. Then, the sample was heated from 100°C to 710°C at a temperature increase of 10°C/min in a helium stream. Thermogravimetric (TGA) and differential thermal analysis (DTA) were conducted using an apparatus (Shimadzu DTG-50) with the ramp rate at 10 °C/min under an air stream. The crystal size and morphology were measured using a field-emission scanning electron microscopy (FE-SEM) (S-4800; Hitachi High-Technologies, Japan).

Local structures around <sup>1</sup>H, <sup>13</sup>C, <sup>27</sup>Al, and <sup>31</sup>P nuclei in as-synthesized GAM-7 were investigated by the solid-state magic angle spinning (MAS) nuclear magnetic resonance (NMR) using an AVANCEIII 400WB spectrometer (Bruker Biospin K.K., Japan). <sup>31</sup>P dipolar decoupling (DD) MAS NMR, {<sup>1</sup>H}-<sup>31</sup>P cross-polarization (CP)/MAS NMR, <sup>27</sup>Al direct-excitation (DE) MAS NMR, {<sup>1</sup>H}-<sup>27</sup>Al CP/MAS NMR and <sup>1</sup>H DEMAS spectra were recorded using a 4.0 mm VT-MAS probe with a rotor spinning rate of 14 kHz. {<sup>1</sup>H}-<sup>13</sup>C CP/MAS spectrum was collected with a spinning rate of 6 kHz for <sup>13</sup>C. <sup>27</sup>Al 3QMAS NMR spectrum with z-filter was also measured using a 3.2 mm triple channel VT-MAS probe with {<sup>1</sup>H} decoupling and spinning rate of 24 kHz. {<sup>27</sup>Al}-<sup>31</sup>P 3QHETCOR spectrum with a double

decoupling ( $^1\text{H}$  and  $^{27}\text{Al}$ ) sequence was also measured with a spinning rate of 15 kHz.  $(\text{NH}_4)_2\text{HPO}_4$  powder, 1.0 M  $\text{AlCl}_3$  aqueous solution, and adamantane powder were used as chemical shift secondary reference materials for  $^{31}\text{P}$ ,  $^{27}\text{Al}$ , and  $^{13}\text{C}$  nuclei, respectively.

### Preparation of $\text{AlPO}_4\text{-5}$

The typical synthetic procedure of  $\text{AlPO}_4\text{-5}$  was as follows. To a mixture of  $\text{H}_3\text{PO}_4$  (19.5 g, 85wt% in water),  $\text{Al}(\text{O}^i\text{Pr})_3$  (26.6 g) and triethylamine (10.5 g) in distilled water (32.2 g) was added diluted HF (0.38 g, 55 wt% in water) in distilled water (2.0 g). The resulting mixture was stirred at room temperature for 2 h and then transferred into a Teflon-lined autoclave. The hydrothermal synthesis was performed at 170 °C for 6 h under static conditions. The obtained product was filtered by suction, washed with distilled water, and dried at 90 °C overnight. Then, the calcination was performed at 600 °C (ramping rate 1 °C/min) for 6 h under airflow to yield the parent  $\text{AlPO}_4\text{-5}$ .

### Preparation of $\text{SAPO-5}$

The  $\text{SAPO-5}$  was prepared according to the reported procedure. The  $\text{Al}(\text{O}^i\text{Pr})_3$  (22.1 g, 54 mmol) was added to 29.4 g of distilled  $\text{H}_2\text{O}$  at room temperature and stirred overnight. Then, a diluted aqueous  $\text{H}_3\text{PO}_4$  (85 wt%) solution (12.5 g, 54 mmol) and 13.7 g  $\text{H}_2\text{O}$ , and triethylamine (5.46 g, 54 mmol) were added at ambient temperature. The resulting mixture was then added to the prescribed amount of  $\text{Si}(\text{OEt})_4$  (TEOS) and was further stirred for an hour to obtain a gel. The hydrothermal synthesis was taken place at 180°C for 24 h under static conditions. After cooling down, the mixture was filtrated by suction, and the obtained solid was washed with distilled water, and then dried at 90 °C overnight. The as-synthesized solid was calcined under airflow at 600 °C for 6 h (ramping rate: 1°C/min) to yield  $\text{SAPO-5}$ .

### The interzeolite conversion

The *izcAP* of  $\text{AlPO}_4\text{-5}$ ; To aqueous solution of diisopropylamine (0.83 g, 8.2 mmol) in distilled water (4.1 g) was added the prescribed amount of the parent  $\text{AlPO}_4\text{-5}$  zeolite, where gel composition is adjusted as following mol ratio;  $\text{T}_2\text{O}_4 : \text{OSDA} : \text{H}_2\text{O} = 1.0 : 1.0 : 27.5$ . The resulting mixture was transferred to a Teflon-lined autoclave and stood at 170 °C for desired period. After cooling to ambient temperature, the product was filtrated, washed with distilled water, and dried.

The *izcMAP* of  $\text{SAPO-5}$ ; The procedure of the *izcMAP* for  $[\text{Si}]\text{GAM-7}$  was the same as mentioned above, and the mixture of chemical composition was as follows;  $\text{T}_2\text{O}_4 : \text{OSDA} : \text{H}_2\text{O} = 1.0 : 1.0 : 27.5$ .

### Hydrothermal synthesis of $\text{GAM-7}$

The suspension of  $\text{Al}(\text{O}^i\text{Pr})_3$  (2.0 g, 5.0 mmol) in distilled water (5.3 g) was added an aqueous  $\text{H}_3\text{PO}_4$  solution (1.2 g, 5.0 mmol), and then, stirred for 1 h at room temperature. The resulting mixture was added a diisopropylamine (1.0 g, 10 mmol), of which gel composition was  $\text{Al}_2\text{O}_3 : \text{P}_2\text{O}_5 : \text{OSDA} : \text{H}_2\text{O} = 0.5 : 0.5 : 1.0 : 27.5$ . After stirring 1 h, the hydrogel was transferred to a Teflon-lined autoclave, and the hydrothermal synthesis was performed at 170 °C for desired period. The obtained solid was filtrated, washed with distilled water, and dried.

### Structure analysis

A high-resolution powder XRD data was collected on the Bruker D8 Advance with Vario-1

diffractometer (Bruker AXS, Japan) equipped with a primary curved monochromator Ge(111) provide Cu K $\alpha_1$  radiation and a 1D position sensitive detector (Bruker VÅNTECH-1, detection solid angle  $2\theta = 6^\circ$ ). The diffractometer was operated at an output of 40 kV–50 mA at room temperature. A total measurement time was 38.25 h. A powder sample was packed into a borosilicate glass capillary tube with inner diameter of 0.5 mm.

Lattice constants and a space group were estimated by the indexing analysis using the program Conograph v2.0 [S1], yielding a monoclinic lattice constant uniquely. Observed integral intensities ( $I_{\text{obs}}$ ) of each diffraction peaks were extracted by the Le Bail method [S2] and a framework structure was solved by the direct method using the  $I_{\text{obs}}$  dataset, which are conducted by the program EXPO2014 [S3]. At this stage, GAM-7 has a layered structure was elucidated. Subsequently, a structure refinement was conducted using a preliminary framework model and several temporally atomic sites as OSDA in the interlayer by the Rietveld method using the program RIETAN-FP v3.0 [S4]. Several constrains for bond lengths (T–O) and bond angles (O–T–O) were applied for optimization of framework geometry. A detailed molecular conformation of diisopropylamine in the interlayer was estimated by the direct space method using the program FOX 2022.1 [S5]. In this analysis, all framework atoms were fixed to the coordinates determined above, and position and conformation of diisopropylamine were optimized [S6]. Finally, the preliminary model including diisopropylamine was refined. Structural models were visualized by the program VESTA3 [S7]. An experimental and crystallographic information are summarized in **Table S4**. The final structural parameters are listed in **Table S5** as a crystallographic information file (CIF) format.

[S1] R. Oishi-Tomiyasu, *Acta Cryst.*, 2016, **A72**, 73–80.

[S2] A. Le Bail, H. Duroy, J.L. Fourquet, *Mater. Res. Bull.* 1988, **23**, 447–452.

[S3] A. Altomare, C. Cuocci, C. Giacovazzo, A. Moliterni, R. Rizzi, N. Corriero and A. Falcicchio, (2013). *J. Appl. Cryst.* 46, 1231–1235.

[S4] F. Izumi and K. Momma, *Solid State Phenom.*, 2007, **130**, 15.

[S5] V. Favre-Nicolin, R.J. Cerny, *Appl. Crystallogr.* **2002**, 35, 734–743

[S6] T. Ikeda, T. Nakaoka, K. Yamamoto, *Microporous Mesoporous Mater.*, **2019**, 284, 19–24.

[S7] K. Momma and F. Izumi, *J. Appl. Crystallogr.*, 2011, **44**, 1272.

[S8] D. Altermatt and I. D. Brown, *Acta Crystallogr.*, 1985, **B41**, 244.

[S9] <https://www.iucr.org/resources/data/data-sets/bond-valence-parameters>

## Contents

**Table S1.** Textural parameters of parent zeolites of AlPO<sub>4</sub>-5 and SAPO-5.

**Table S2.** Textural parameters of other parent zeolites in this study.

**Table S3.** Screening of the *izcAP* of AlPO<sub>4</sub>-5.

**Table S4.** Experimental conditions and crystallographic information.

**Table S5.** Crystallographic information file (CIF) of GAM-7.

**Fig. S1.** Powder XRD charts by the *izcMAP* of SAPO-5(0.20).

**Fig. S2.** Powder XRD charts by the *izcMAP* of SAPO-5(0.05).

**Fig. S3.** Powder XRD charts by the *izcAP* of AlPO<sub>4</sub>-11 (left), and FE-SEM images of AlPO<sub>4</sub>-11 (right, up) and the product after 3 days (right, down).

**Fig. S4.** Powder XRD charts by the *izcAP* of AlPO<sub>4</sub>-14 (left), and FE-SEM images of AlPO<sub>4</sub>-14 (right, up) and the product after 5 days (right, down).

**Fig. S5.** Powder XRD charts by the *izcMAP* of CoAPO-5(0.10), and FE-SEM images of CoAPO-5(0.10) (right, up) and the product after 5 days (right, down).

**Fig. S6.** Powder XRD charts by the *izcMAP* of GeAPO-5(0.10), and FE-SEM images of GeAPO-5(0.10) (right, up) and the product after 3 days (right, down).

**Fig. S7.** Powder XRD charts by the *izcMAP* of SAPO-11(0.10), and FE-SEM image of SAPO-11(0.10) (right).

**Fig. S8.** Powder XRD charts by the *izcMAP* of GeAPO-11(0.10), and FE-SEM images of GeAPO-11(0.10) (right, up) and the product after 3 days (right, down).

**Fig. S9.** FE-SEM image of GAM-7 synthesized by HTS using an aluminophosphate hydrogel.

**Fig. S10.** Powder XRD charts of the obtained product by HTS method using silico-aluminophosphate gel.

**Fig. S11.** TG-DTA chart of the GAM-7.

**Fig. S12.** Solid-state <sup>13</sup>C MAS NMR spectrum of GAM-7.

**Fig. S13.** Solid-state <sup>1</sup>H MAS NMR spectrum of GAM-7.

**Fig. S14.** Solid-state <sup>27</sup>Al MAS (a) and <sup>27</sup>Al CP/MAS NMR (b) spectra of GAM-7.

**Fig. S15.** Solid-state <sup>27</sup>Al 3QMAS NMR spectrum of GAM-7.

**Fig. S16.** Solid-state <sup>31</sup>P DDMA NMR (a) and <sup>31</sup>P CP/MAS NMR spectra of GAM-7.

**Fig. S17.** Solid-state {<sup>27</sup>Al}→<sup>31</sup>P 3QHETCOR NMR spectrum of GAM-7.

In the dotted area, the spectral intensity was increased by a factor of 5 to emphasize the weak peaks. The peak labels in each projected spectrum correspond to the site labels in the crystal structure model described in Table S5.

**Fig. S18.** The crystal structure of GAM-7 viewed along the *a*-axis.

**Fig. S19.** The crystal structure of GAM-7 viewed along the *b*-axis.

**Fig. S20.** The crystal structure of GAM-7 viewed along the *c*-axis.

**Fig. S21.** Observed (red crosses), calculated (light blue solid line), and difference (blue) patterns obtained by the Rietveld refinement for GAM-7. Tick marks (green) denote the peak positions of possible Bragg reflections. The inset shows magnified patterns from 28° to 110°.

**Fig. S22.** Powder XRD charts during the *izcAP* corresponding to experimental results in Figure 7.

**Table S1.** Textural parameters of parent zeolites of AlPO<sub>4</sub>-5 and SAPO-5.

| parent zeolite       | chemical composition <sup>a</sup> |                               |                  | surface area <sup>b</sup><br>(m <sup>2</sup> /g) | pore volume <sup>b</sup><br>(mL/g) |
|----------------------|-----------------------------------|-------------------------------|------------------|--------------------------------------------------|------------------------------------|
|                      | Al <sub>2</sub> O <sub>3</sub>    | P <sub>2</sub> O <sub>5</sub> | SiO <sub>2</sub> |                                                  |                                    |
| AlPO <sub>4</sub> -5 | 0.51                              | 0.49                          | —                | 242                                              | 0.19                               |
| SAPO-5(0.20)         | 0.25                              | 0.23                          | 0.045            | 357                                              | 0.27                               |
| SAPO-5(0.05)         | 0.26                              | 0.24                          | 0.01             | 259                                              | 0.22                               |
| SAPO-5(0.01)         | 0.26                              | 0.24                          | 0.002            | 281                                              | 0.29                               |

<sup>a</sup> Measured by XRF

<sup>b</sup> Estimated by N<sub>2</sub> adsorption isotherm.

**Table S2.** Textual parameters of other parent zeolites in this study.

| parent zeolite        | FTC <sup>a</sup> | chemical composition <sup>b</sup> |                               |                              | surface area <sup>c</sup><br>(m <sup>2</sup> /g) | pore volume <sup>c</sup><br>(mL/g) |
|-----------------------|------------------|-----------------------------------|-------------------------------|------------------------------|--------------------------------------------------|------------------------------------|
|                       |                  | Al <sub>2</sub> O <sub>3</sub>    | P <sub>2</sub> O <sub>5</sub> | TO <sub>2</sub> <sup>d</sup> |                                                  |                                    |
| AlPO <sub>4</sub> -11 | <b>AEL</b>       | 0.48                              | 0.34                          | —                            | 157                                              | 0.33                               |
| AlPO <sub>4</sub> -14 | <b>AFN</b>       | 0.41                              | 0.41                          | —                            | 199                                              | 0.15                               |
| CoAPO-5(0.10)         | <b>AFI</b>       | 0.47                              | 0.45                          | 0.09                         | 208                                              | 0.15                               |
| GeAPO-5(0.10)         |                  | 0.44                              | 0.36                          | 0.04                         | 113                                              | 0.25                               |
| SAPO-11(0.05)         |                  | 0.43                              | 0.39                          | 0.02                         | 74                                               | 0.22                               |
| SAO-11(0.01)          | <b>AEL</b>       | 0.43                              | 0.37                          | 0.005                        | 58                                               | 0.24                               |
| GeAPO-11(0.10)        |                  | 0.43                              | 0.38                          | 0.02                         | 131                                              | 0.28                               |

<sup>a</sup> Framework type code

<sup>b</sup> Estimated by XRF

<sup>c</sup> Estimated by N<sub>2</sub> adsorption analysis

<sup>d</sup> Amount of incorporated heteroatom

**Table S3.** Screening of the *izcAP* of  $\text{AlPO}_4\text{-5}$ .<sup>a</sup>

| entry           | OSDA <sup>b</sup> | H <sub>2</sub> O <sup>c</sup> | time (d) | product <sup>d</sup>                         |
|-----------------|-------------------|-------------------------------|----------|----------------------------------------------|
| 1               |                   |                               | 3        | $\text{AlPO}_4\text{-5}$ + GAM-7             |
| 2               | 0.30              | 27.5                          | 5        | $\text{AlPO}_4\text{-5}$ + tridymite         |
| 3               |                   |                               | 7        | $\text{AlPO}_4\text{-5}$ + tridymite         |
| 4               |                   |                               | 3        | $\text{AlPO}_4\text{-5}$ + tridymite         |
| 5               | 0.30              | 21.0                          | 5        | tridymite                                    |
| 6               |                   |                               | 7        | tridymite                                    |
| 7               |                   |                               | 3        | $\text{AlPO}_4\text{-5}$ + GAM-7 + tridymite |
| 8               | 0.30              | 13.5                          | 5        | $\text{AlPO}_4\text{-5}$ + GAM-7 + tridymite |
| 9               |                   |                               | 7        | GAM-7 + tridymite                            |
| 10 <sup>e</sup> | 0.30              | 13.5                          | 5        | $\text{AlPO}_4\text{-11}$ + tridymite        |
| 11e             |                   |                               | 7        | $\text{AlPO}_4\text{-11}$ + tridymite        |
| 12              |                   |                               | 3        | GAM-7                                        |
| 13              | 0.60              | 27.5                          | 5        | GAM-7                                        |
| 14              |                   |                               | 7        | GAM-7                                        |
| 15              | 1.0               | 27.5                          | 2        | GAM-7                                        |
| 16              |                   |                               | 4        | GAM-7                                        |
| 17 <sup>f</sup> |                   |                               | 3        | $\text{AlPO}_4\text{-5}$ + unknown           |
| 18f             | 0.80              | 27.5                          | 5        | $\text{AlPO}_4\text{-11}$ + unknown          |
| 19f             |                   |                               | 7        | $\text{AlPO}_4\text{-11}$ + unknown          |

a The *izcAP* was performed using  $\text{AlPO}_4\text{-5}$  as the parent and diisopropylamine as the OSDA at 170 °C.

b The molar ratio of OSDA/ $\text{T}_2\text{O}_4$ .

c The molar ratio of  $\text{H}_2\text{O}/\text{T}_2\text{O}_4$ .

d Assigned by powder XRD.

e HF ( $\text{HF}/\text{T}_2\text{O}_4 = 0.05$ ) was added.

f  $\text{H}_3\text{PO}_4$  ( $\text{H}_3\text{PO}_4/\text{T}_2\text{O}_4 = 0.23$ ) was added.

**Table S4.** Experimental conditions and crystallographic information for GAM-7.

|                                                                        |                                                              |
|------------------------------------------------------------------------|--------------------------------------------------------------|
| Compound name                                                          | GAM-7                                                        |
| Estimated chemical composition                                         | $[(C_6H_{15}N)_{3.67}] \cdot [Al_{16}P_{12}O_{44}(OH)_{20}]$ |
| Space group                                                            | $P2_1/c$                                                     |
| $a$ / nm                                                               | 1.367980(11)                                                 |
| $b$ / nm                                                               | 1.420480(12)                                                 |
| $c$ / nm                                                               | 0.999269(8)                                                  |
| $\beta$ / °                                                            | 100.0990(9)                                                  |
| Unit-cell volume, $V$ / nm <sup>3</sup>                                | 1.91168(3)                                                   |
| $2\theta$ range / °                                                    | 4.0–110.1                                                    |
| Step size ( $2\theta$ ) / °                                            | 0.016346                                                     |
| Profile range in FWHM                                                  | 12                                                           |
| Number of observations                                                 | 6502                                                         |
| Number of contributing reflections                                     | 2406                                                         |
| Number of refined structural parameters                                | 158                                                          |
| Number of constraints                                                  | 167                                                          |
| $R$ -factors, goodness-of-fit indicator obtained by Rietveld analysis. |                                                              |
| $R_{wp}$                                                               | 0.026                                                        |
| $R_p$                                                                  | 0.021                                                        |
| $R_F$                                                                  | 0.014                                                        |
| $R_{Bragg}$                                                            | 0.015                                                        |
| $R_{exp}$                                                              | 0.015                                                        |
| $S$                                                                    | 1.797                                                        |
| $\chi^2$                                                               | 3.22                                                         |

**Table S5.** Crystallographic information file (CIF) of GAM-7.

```

#=====
# CRYSTAL DATA
#-----
data_VESTA_phase_1

_chemical_name_common          'GAM-7'
_cell_length_a                 13.67980(11)
_cell_length_b                 14.20480(12)
_cell_length_c                 9.99269(8)
_cell_angle_alpha              90.000000
_cell_angle_beta               100.0990(10)
_cell_angle_gamma              90.000000
_cell_volume                   1911.682503
_space_group_name_H-M_alt      'P 21/c'
_space_group_IT_number         14

loop_
_space_group_symop_operation_xyz
  'x, y, z'
  '-x, -y, -z'
  '-x, y+1/2, -z+1/2'
  'x, -y+1/2, z+1/2'

loop_
  _atom_site_label
  _atom_site_fract_x
  _atom_site_fract_y
  _atom_site_fract_z
  _atom_site_occupancy
  _atom_site_symmetry_multiplicity
  _atom_site_Wyckoff_symbol
  _atom_site_adp_type
  _atom_site_U_iso_or_equiv
  _atom_site_type_symbol
Al1      0.2228(4)  0.2110(4)  0.4334(6)  1      4 e Uiso  0.0171(3)  Al
Al2      0.5672(5)  0.3548(4)  0.0155(6)  1      4 e Uiso  0.0171(3)  Al
Al3      0.3787(5)  0.1123(4)  0.0612(6)  1      4 e Uiso  0.0171(3)  Al
Al4      0.5627(4)  0.0139(4)  0.1361(5)  1      4 e Uiso  0.0171(3)  Al
P1       0.3660(4)  0.4488(4)  0.0534(5)  1      4 e Uiso  0.0171(3)  P
P2       0.1632(5)  0.1576(4)  0.1383(5)  1      4 e Uiso  0.0171(3)  P
P3       0.5554(4)  0.2164(4)  0.2322(5)  1      4 e Uiso  0.0171(3)  P
O1       0.6424(8)  0.4481(7)  -0.003(1)  1      4 e Uiso  0.0210(8)  O
O2       0.3835(8)  0.4427(7)  0.216(1)  1      4 e Uiso  0.0210(8)  O
O3       0.2702(8)  0.1043(8)  0.497(1)  1      4 e Uiso  0.0210(8)  O
O4       0.4488(8)  0.3992(7)  -0.005(1)  1      4 e Uiso  0.0210(8)  O
O5       0.5669(8)  0.2318(7)  0.390(1)  1      4 e Uiso  0.0210(8)  O
O6       0.5991(8)  0.3043(8)  0.172(1)  1      4 e Uiso  0.0210(8)  O
O7       0.3293(9)  0.4894(9)  0.450(1)  1      4 e Uiso  0.0210(8)  O
O8       0.2753(9)  0.1182(7)  0.150(1)  1      4 e Uiso  0.0210(8)  O
O9       0.498(1)   0.4061(8)  0.474(1)  1      4 e Uiso  0.0210(8)  O
O10      0.3223(8)   0.2937(8)  0.422(1)  1      4 e Uiso  0.0210(8)  O
O11      0.4419(8)   0.0269(8)  0.193(1)  1      4 e Uiso  0.0210(8)  O
O12      0.4450(7)   0.2116(8)  0.171(1)  1      4 e Uiso  0.0210(8)  O
O13      0.6100(8)   0.1254(8)  0.208(1)  1      4 e Uiso  0.0210(8)  O

```

Table S5. Continued.

|     |           |           |          |          |          |           |   |
|-----|-----------|-----------|----------|----------|----------|-----------|---|
| O14 | 0.1434(8) | 0.2432(7) | 0.038(1) | 1        | 4 e Uiso | 0.0210(8) | O |
| O15 | 0.1509(8) | 0.1954(7) | 0.277(1) | 1        | 4 e Uiso | 0.0210(8) | O |
| O16 | 0.0823(9) | 0.0817(9) | 0.088(1) | 1        | 4 e Uiso | 0.0210(8) | O |
| C1  | 0.858(2)  | 0.160(2)  | 0.833(3) | 0.924(6) | 4 e Uiso | 0.035(3)  | C |
| N2  | 0.947(1)  | 0.098(1)  | 0.842(2) | 0.924(6) | 4 e Uiso | 0.035(3)  | N |
| C3  | 0.814(2)  | 0.144(2)  | 0.958(3) | 0.924(6) | 4 e Uiso | 0.035(3)  | C |
| C4  | 0.892(2)  | 0.260(2)  | 0.835(2) | 0.924(6) | 4 e Uiso | 0.035(3)  | C |
| C5  | 0.995(2)  | 0.107(2)  | 0.719(3) | 0.924(6) | 4 e Uiso | 0.035(3)  | C |
| C6  | 1.083(2)  | 0.044(2)  | 0.735(2) | 0.924(6) | 4 e Uiso | 0.035(3)  | C |
| C7  | 0.921(2)  | 0.071(2)  | 0.602(3) | 0.924(6) | 4 e Uiso | 0.035(3)  | C |
| H8  | 0.81(1)   | 0.14(1)   | 0.74(2)  | 0.924(6) | 4 e Uiso | 0.035(3)  | H |
| H9  | 0.93(1)   | 0.03(1)   | 0.85(2)  | 0.924(6) | 4 e Uiso | 0.035(3)  | H |
| H10 | 0.86(1)   | 0.17(1)   | 1.05(2)  | 0.924(6) | 4 e Uiso | 0.035(3)  | H |
| H11 | 0.75(1)   | 0.18(1)   | 0.94(2)  | 0.924(6) | 4 e Uiso | 0.035(3)  | H |
| H12 | 0.80(1)   | 0.07(1)   | 0.97(2)  | 0.924(6) | 4 e Uiso | 0.035(3)  | H |
| H13 | 0.86(1)   | 0.29(1)   | 0.73(2)  | 0.924(6) | 4 e Uiso | 0.035(3)  | H |
| H14 | 0.87(1)   | 0.30(1)   | 0.92(2)  | 0.924(6) | 4 e Uiso | 0.035(3)  | H |
| H15 | 0.97(1)   | 0.26(1)   | 0.84(2)  | 0.924(6) | 4 e Uiso | 0.035(3)  | H |
| H16 | 1.01(1)   | 0.18(1)   | 0.71(2)  | 0.924(6) | 4 e Uiso | 0.035(3)  | H |
| H17 | 1.10(1)   | 0.01(1)   | 0.83(1)  | 0.924(6) | 4 e Uiso | 0.035(3)  | H |
| H18 | 1.07(1)   | -0.01(1)  | 0.66(2)  | 0.924(6) | 4 e Uiso | 0.035(3)  | H |
| H19 | 1.14(1)   | 0.09(1)   | 0.71(2)  | 0.924(6) | 4 e Uiso | 0.035(3)  | H |
| H20 | 0.91(1)   | 0.00(1)   | 0.63(2)  | 0.924(6) | 4 e Uiso | 0.035(3)  | H |
| H21 | 0.85(1)   | 0.11(1)   | 0.60(2)  | 0.924(6) | 4 e Uiso | 0.035(3)  | H |
| H22 | 0.95(1)   | 0.08(1)   | 0.51(2)  | 0.924(6) | 4 e Uiso | 0.035(3)  | H |
| Hm1 | 0.11(1)   | 0.02(1)   | 0.09(2)  | 1        | 4 e Uiso | 0.0210(8) | H |
| Hm2 | 0.32(1)   | 0.54(1)   | 0.51(1)  | 1        | 4 e Uiso | 0.0210(8) | H |
| Hm3 | 0.41(1)   | -0.036(9) | 0.20(1)  | 1        | 4 e Uiso | 0.0210(8) | H |
| Hm4 | 0.52(1)   | 0.344(9)  | 0.44(1)  | 1        | 4 e Uiso | 0.0210(8) | H |
| Hm5 | 0.37(1)   | 0.28(1)   | 0.36(1)  | 1        | 4 e Uiso | 0.0210(8) | H |

#=====

=====

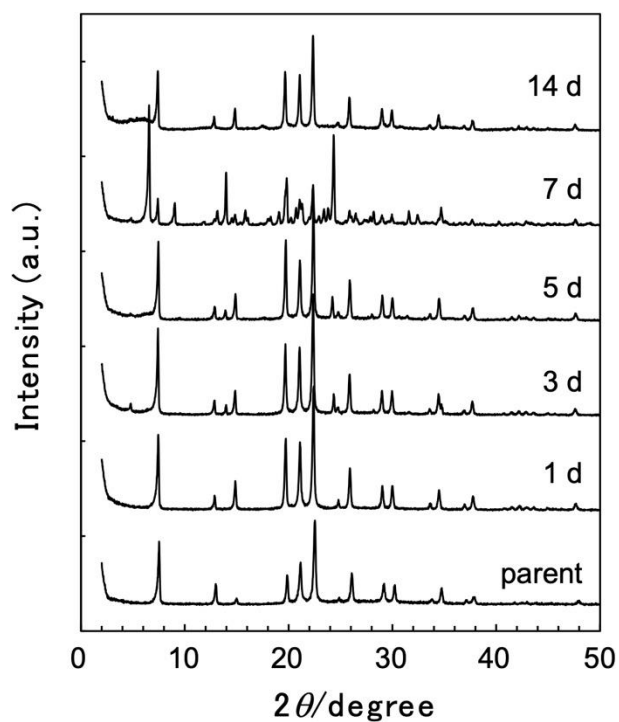

**Fig. S1.** Powder XRD charts of the product by *izc*MAP of SAPO-5(0.20) for different times.

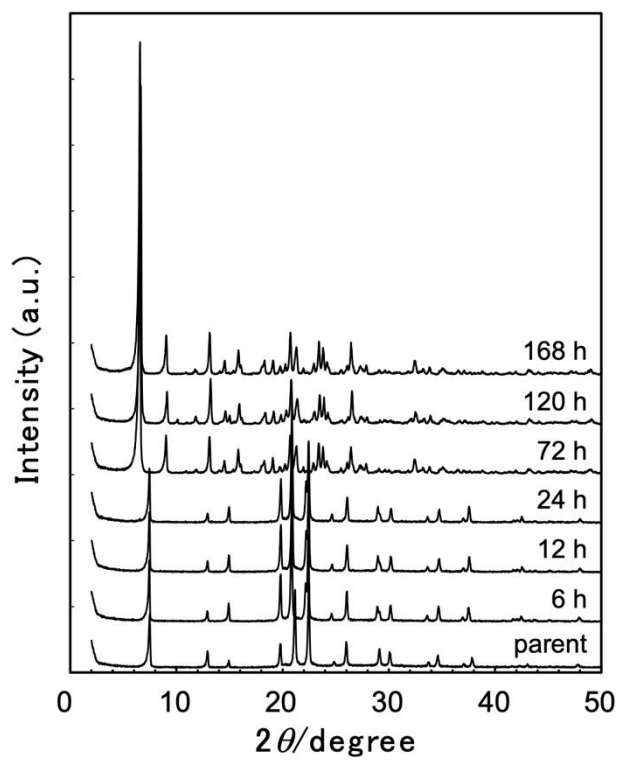

**Fig. S2.** Powder XRD charts of the product by *izc*MAP of SAPO-5(0.05) for different times.

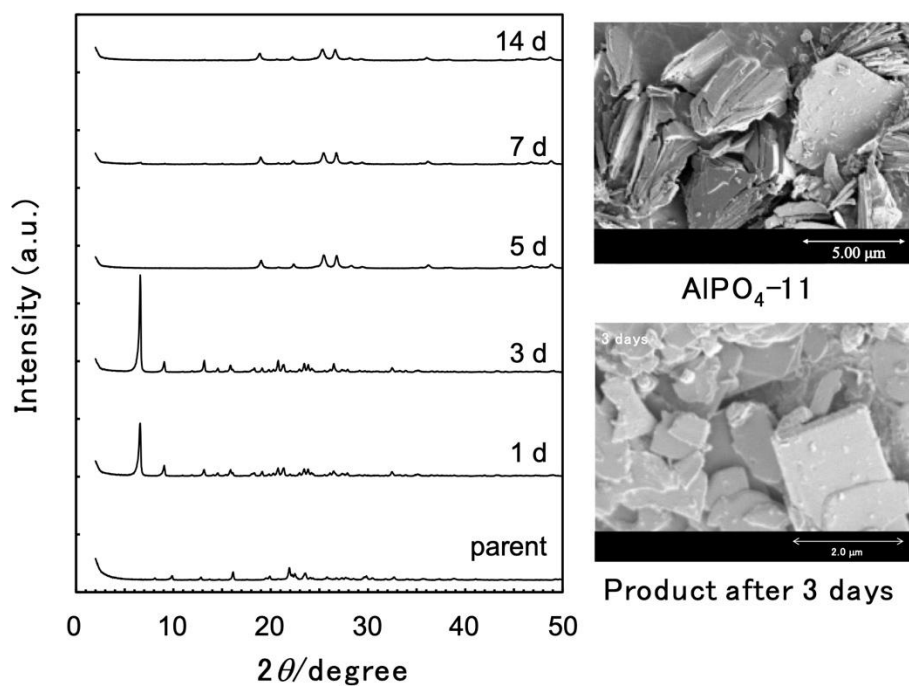

**Fig. S3.** Powder XRD charts by the *izcAP* of  $\text{AlPO}_4\text{-11}$  (left), and FE-SEM images of  $\text{AlPO}_4\text{-11}$  (right, up) and the product after 3 days (right, down).

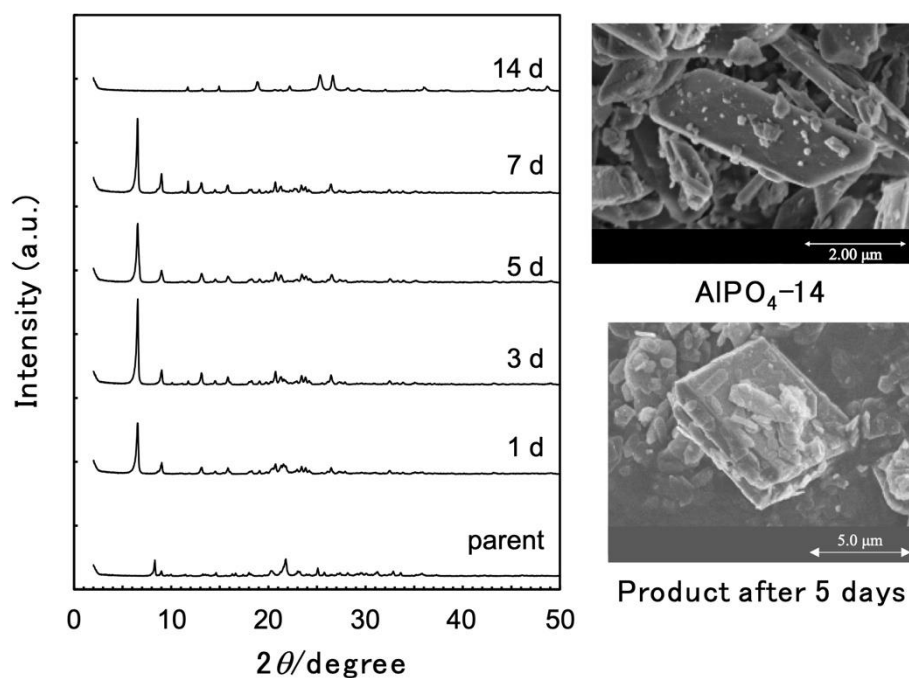

**Fig. S4.** Powder XRD charts by the *izcAP* of  $\text{AlPO}_4\text{-14}$  (left), and FE-SEM images of  $\text{AlPO}_4\text{-14}$  (right, up) and the product after 5 days (right, down).

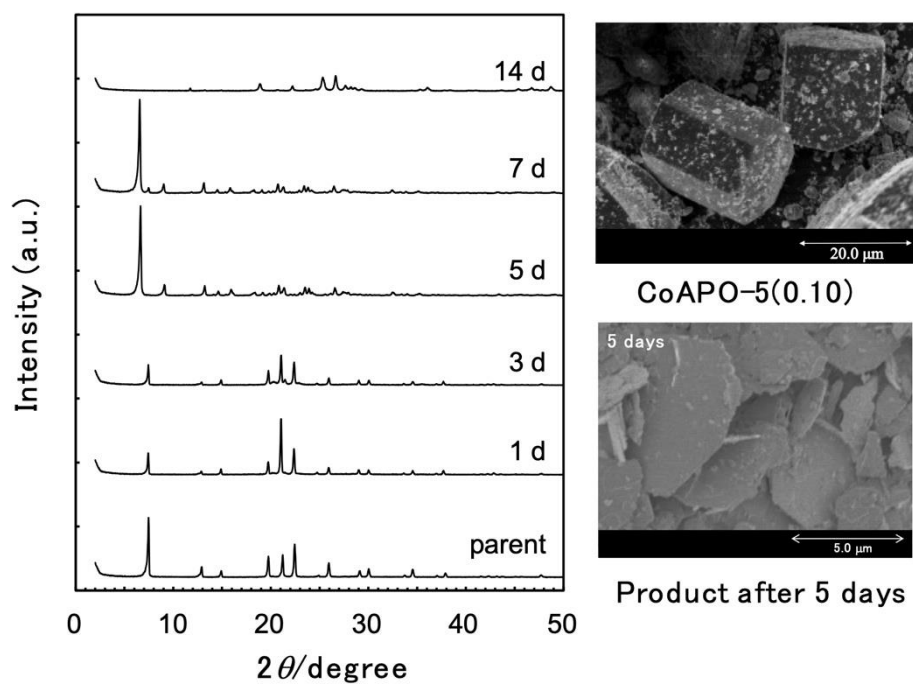

**Fig. S5.** Powder XRD charts by the *izc*MAP of CoAPO-5(0.10), and FE-SEM images of CoAPO-5(0.10) (right, up) and the product after 5 days (right, down).

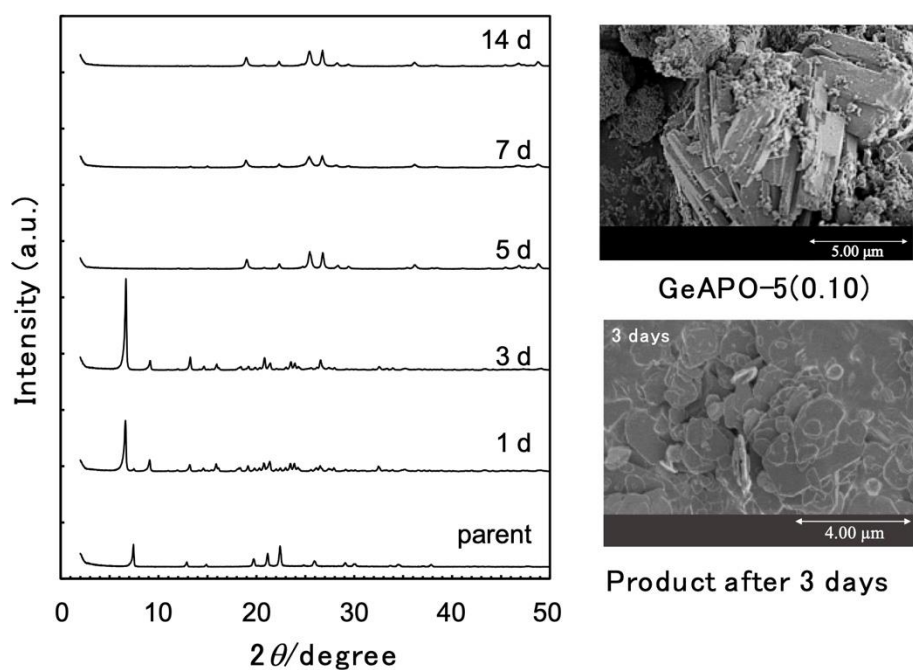

**Fig. S6.** Powder XRD charts by the *izc*MAP of GeAPO-5(0.10), and FE-SEM images of GeAPO-5(0.10) (right, up) and the product after 3 days (right, down).

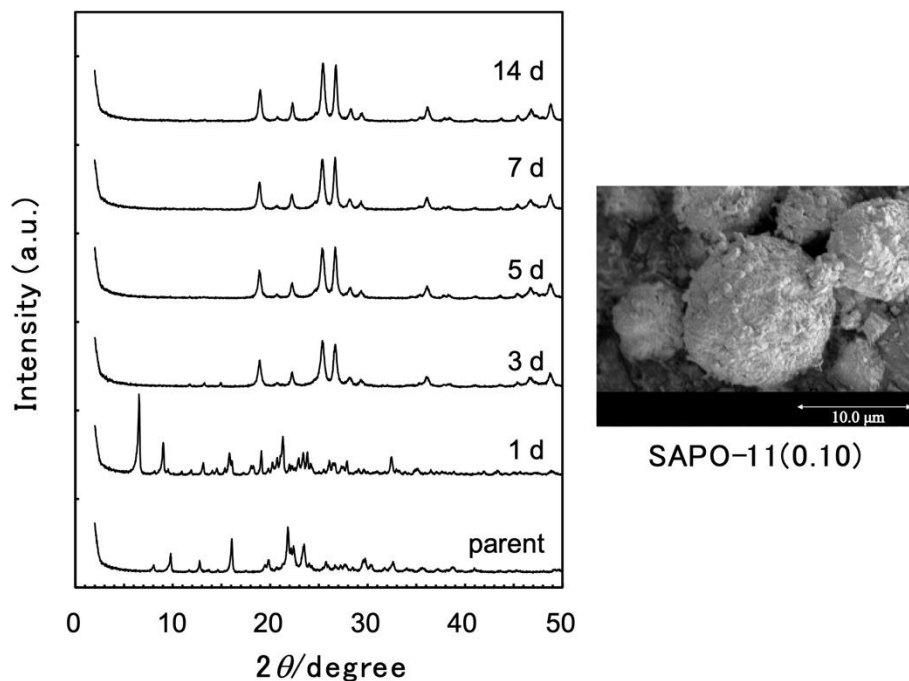

**Fig. S7.** Powder XRD charts by the *izc*MAP of SAPO-11(0.10), and FE-SEM image of SAPO-11(0.10) (right).

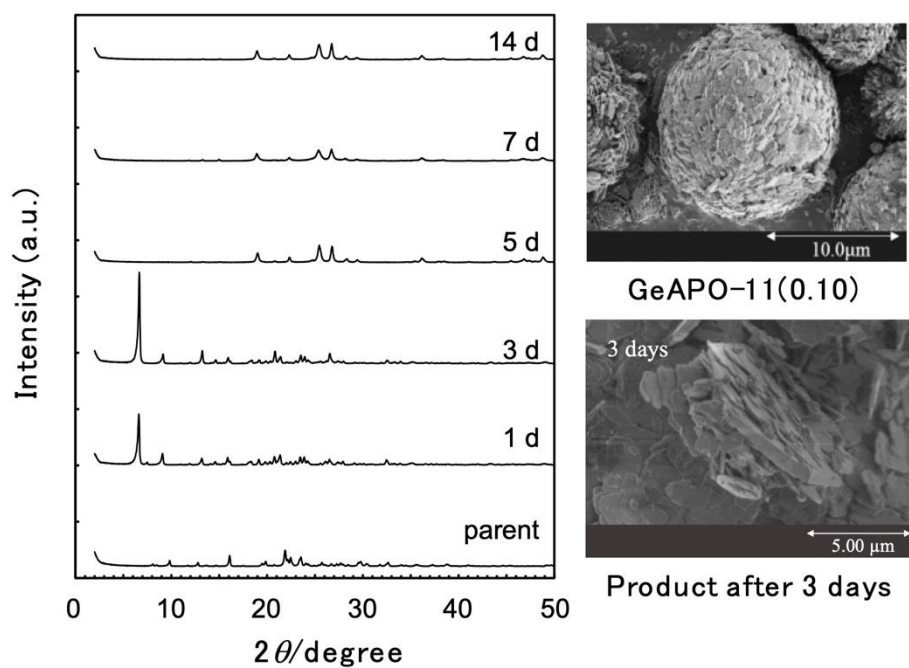

**Fig. S8.** Powder XRD charts by the *izc*MAP of GeAPO-11(0.10), and FE-SEM images of GeAPO-11(0.10) (right, up) and the product after 3 days (right, down).

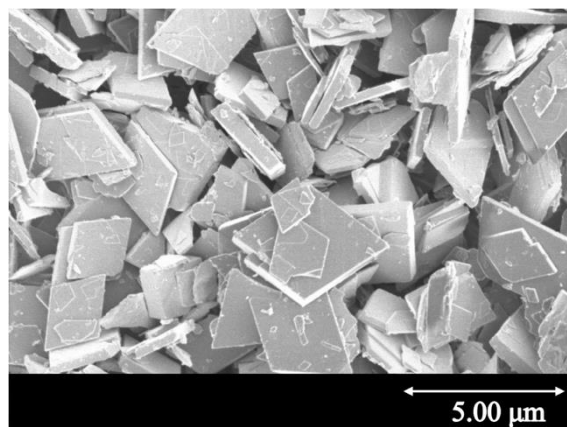

**Fig. S9.** FE-SEM image of GAM-7 synthesized by HTS method.

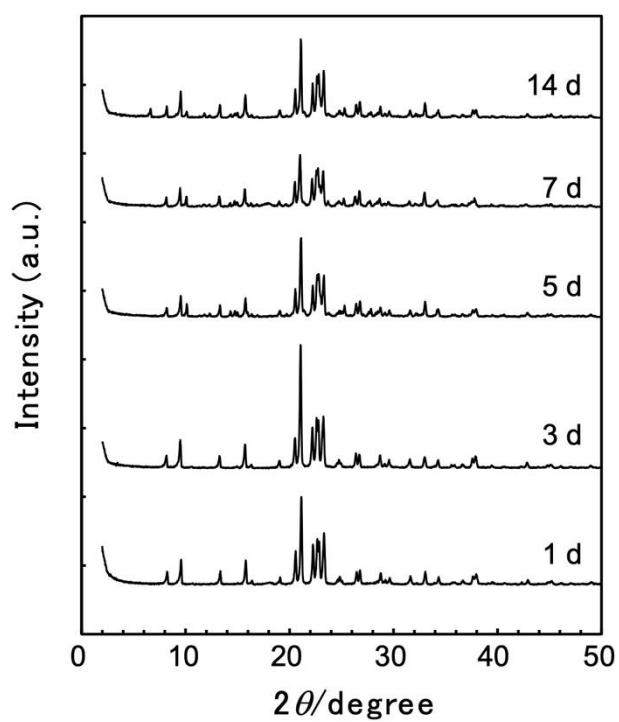

**Fig. S10.** Powder XRD charts of the obtained product by HTS method using silico-aluminophosphate gel.

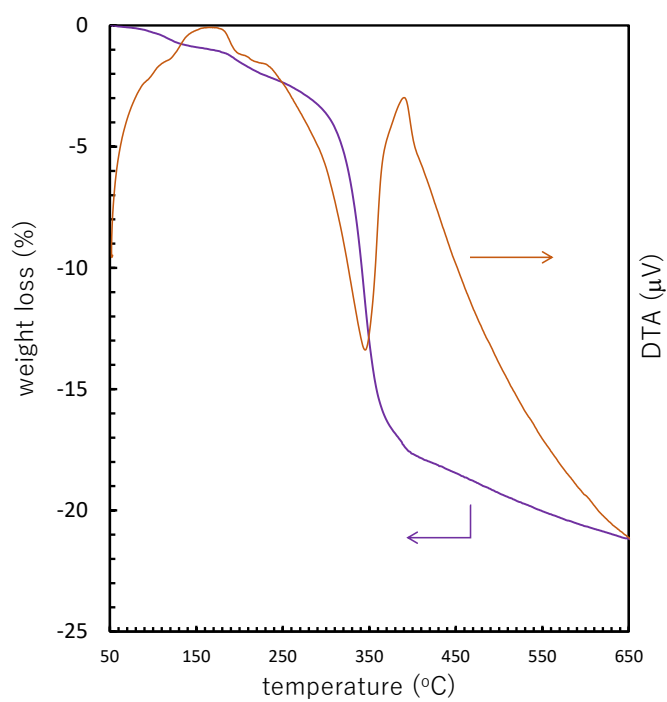

**Fig. S11.** TG-DTA chart of GAM-7.

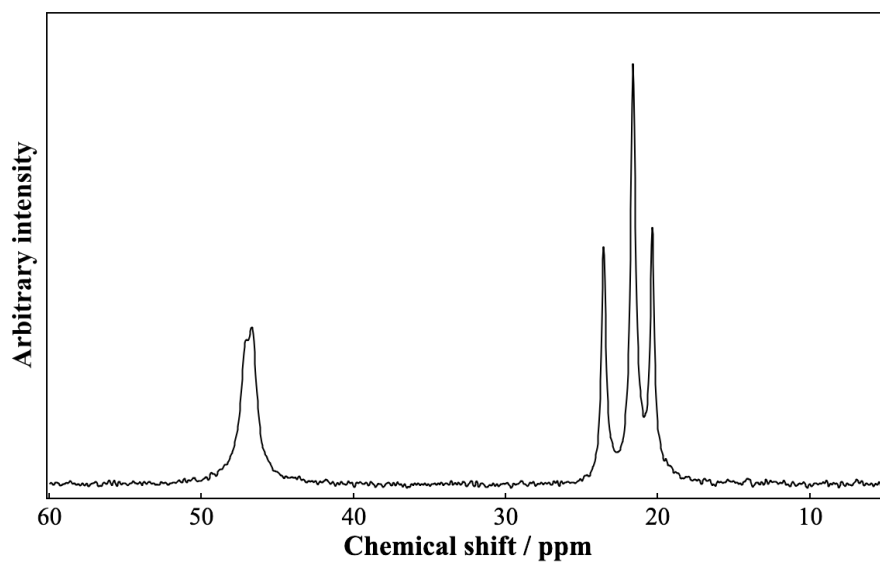

**Fig. S12.** Solid-state <sup>13</sup>C CP/MAS NMR spectrum of GAM-7.

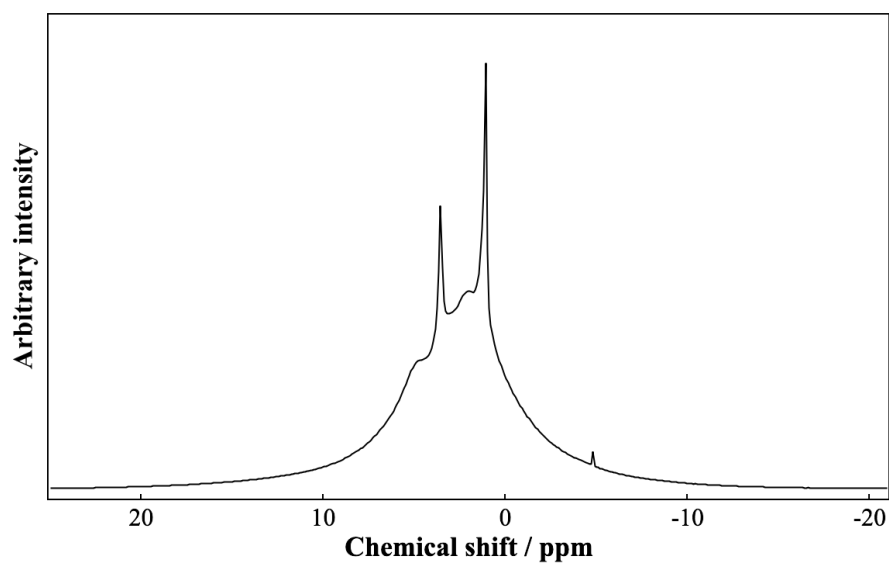

**Fig. S13.** Solid-state  $^1\text{H}$  DEMAS NMR spectrum of GAM-7.

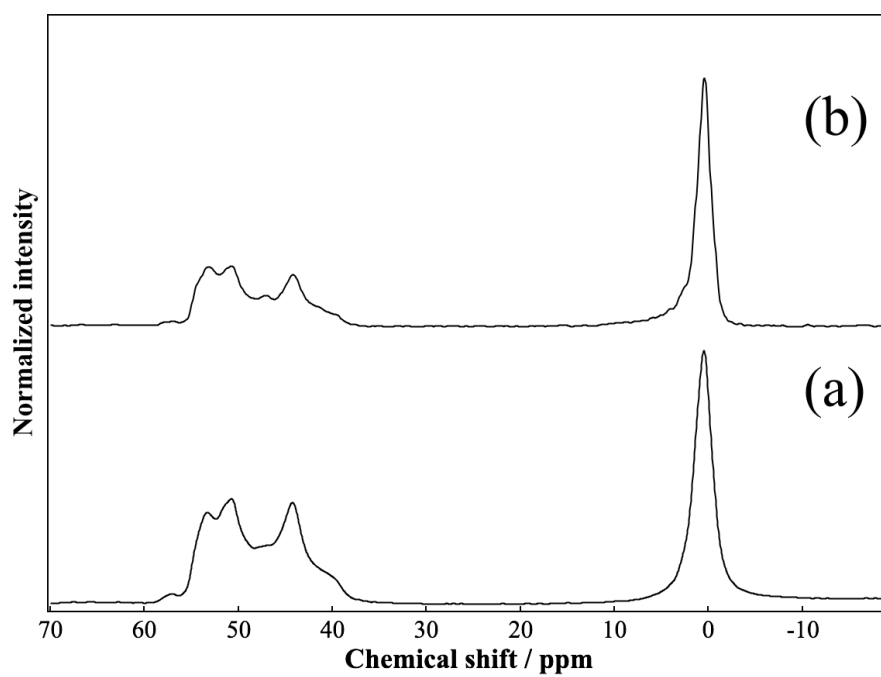

**Fig. S14.** Solid-state  $^{27}\text{Al}$  DEMAS (a) and  $^{27}\text{Al}$  CP/MAS NMR (b) spectra of GAM-7.

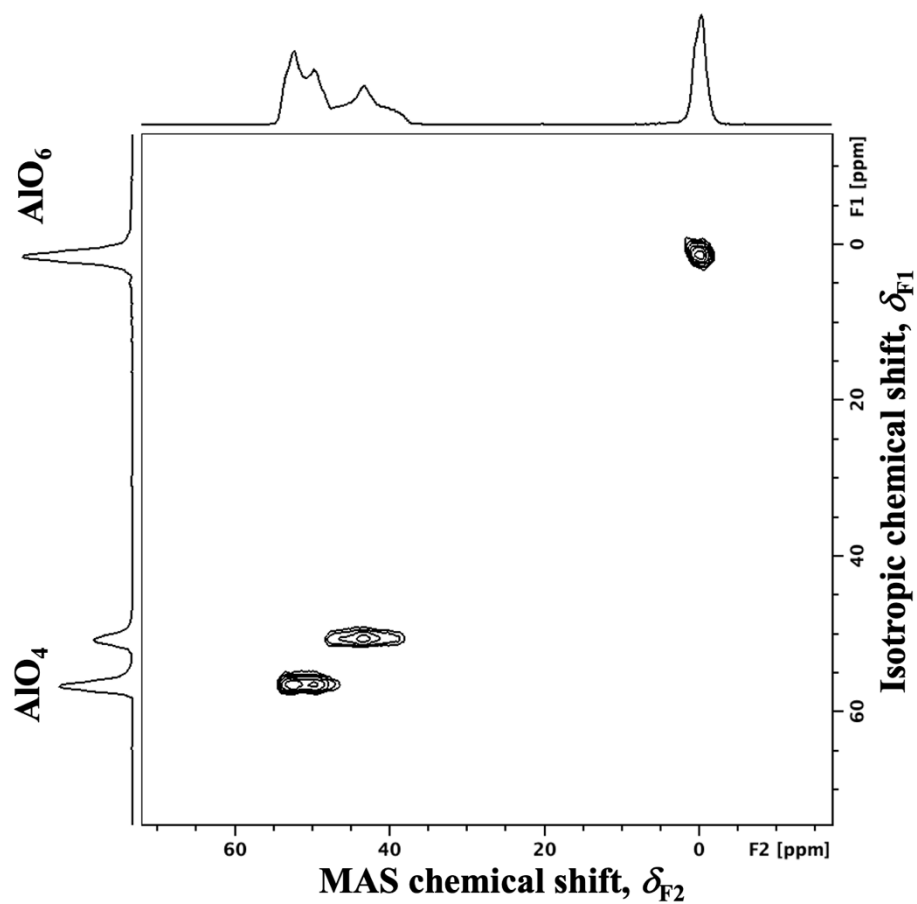

**Fig. S15.** Solid-state  $^{27}\text{Al}$  3QMAS NMR spectrum of GAM-7.

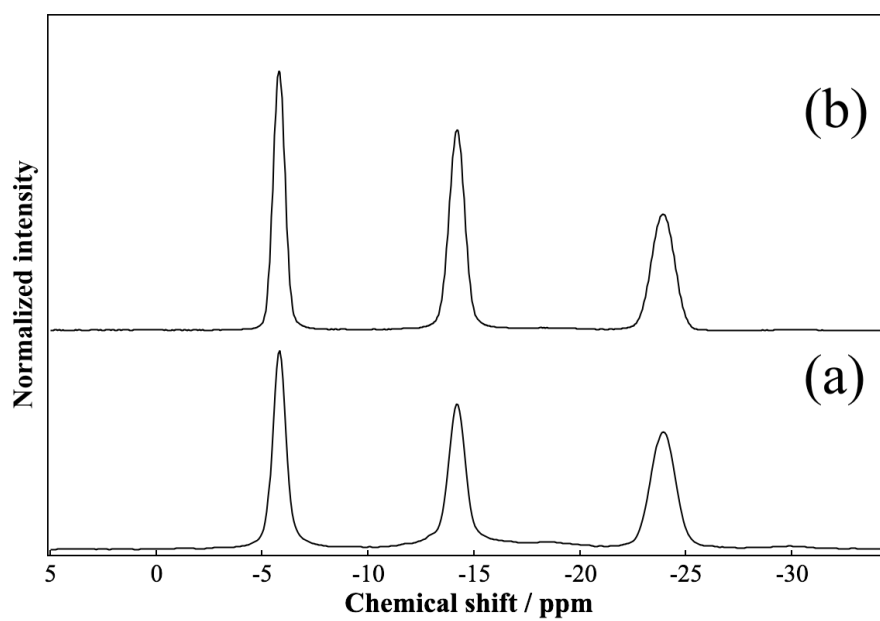

**Fig. S16.** Solid-state  $^{31}\text{P}$  DDMA5 NMR (a) and  $^{31}\text{P}$  CP/MAS NMR spectra of GAM-7.

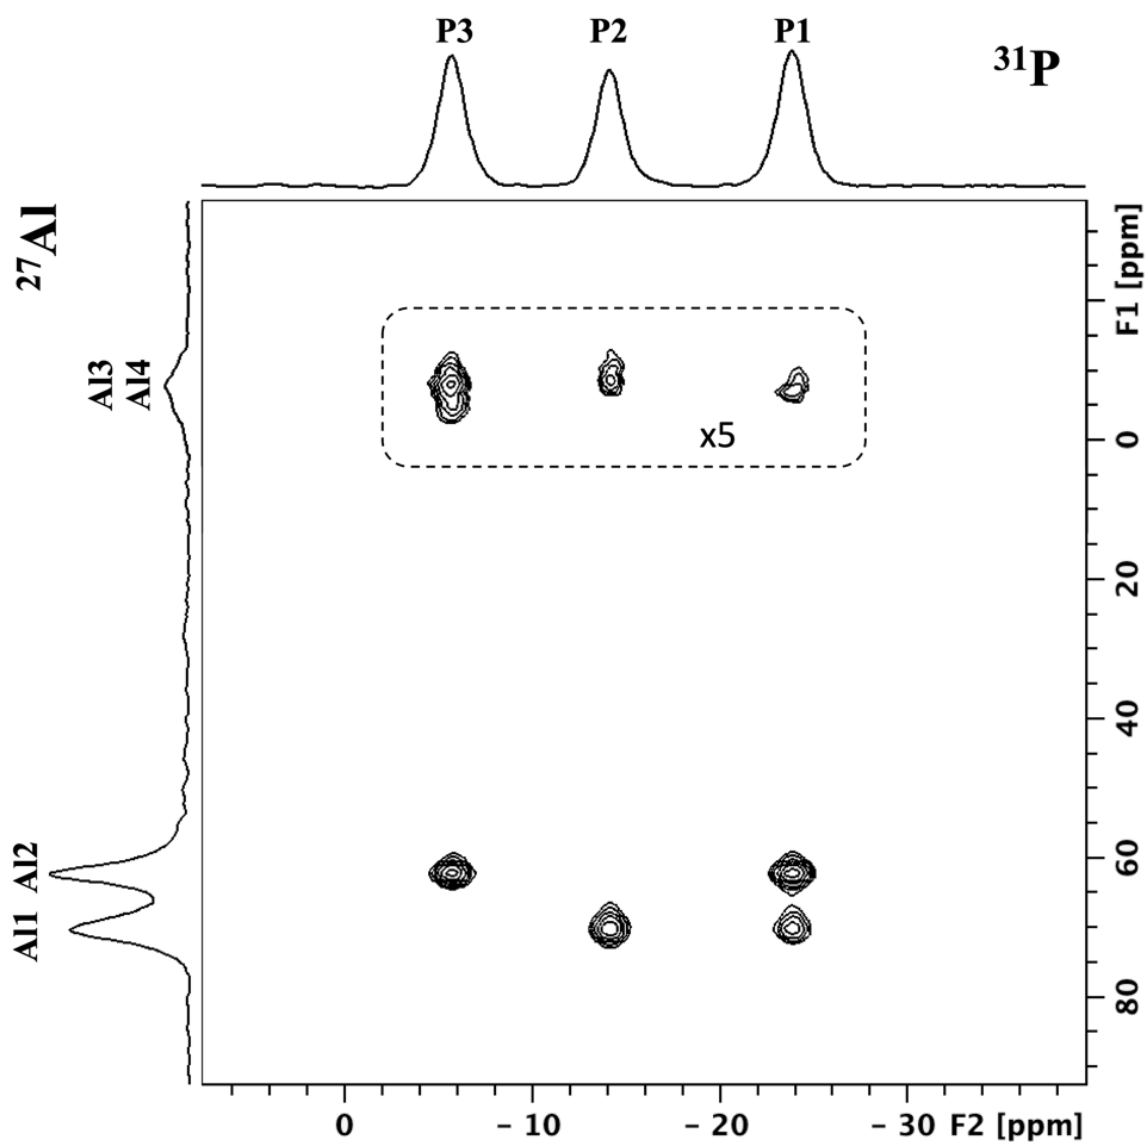

**Fig. S17.** Solid-state  $\{^{27}\text{Al}\} \rightarrow ^{31}\text{P}$  3QHETCOR NMR spectrum of GAM-7. In the dotted area, the spectral intensity was increased by a factor of 5 to emphasize the weak peaks. The peak labels in each projected spectrum correspond to the site labels in the crystal structure model described in Table S5.

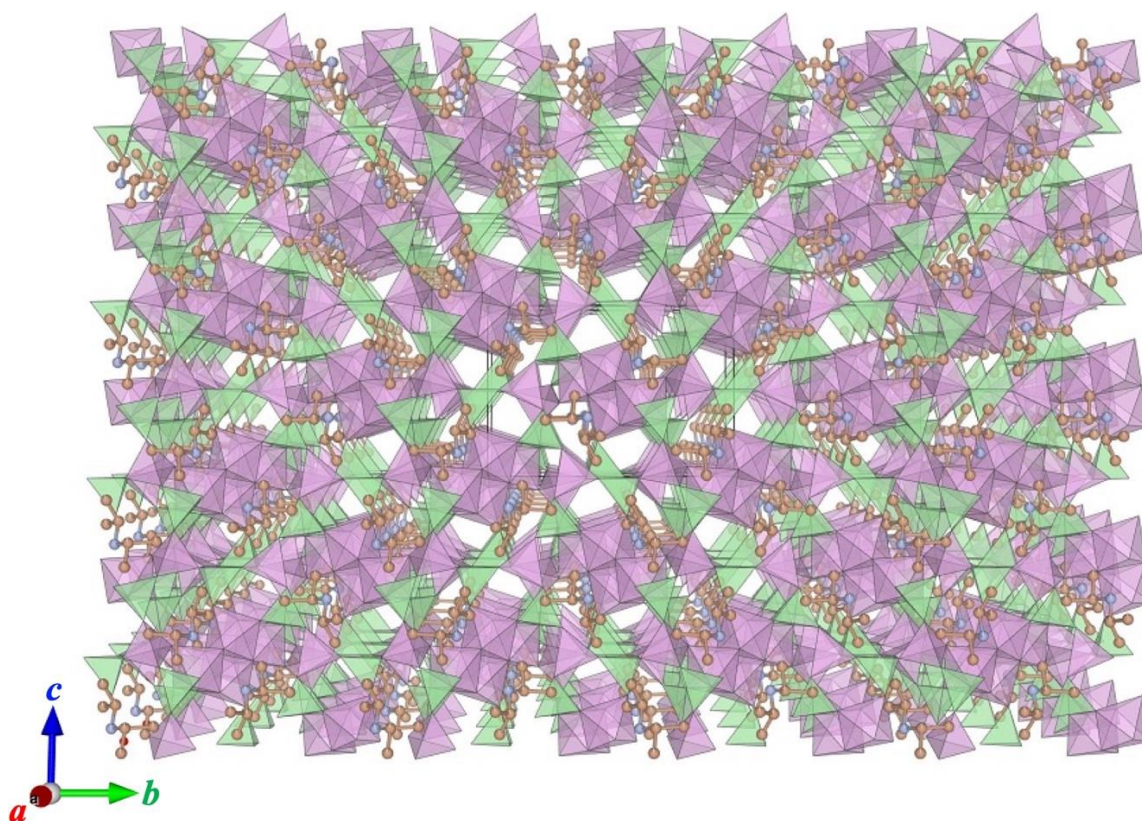

**Fig. S18.** The crystal structure of GAM-7 viewed along the *a*-axis.

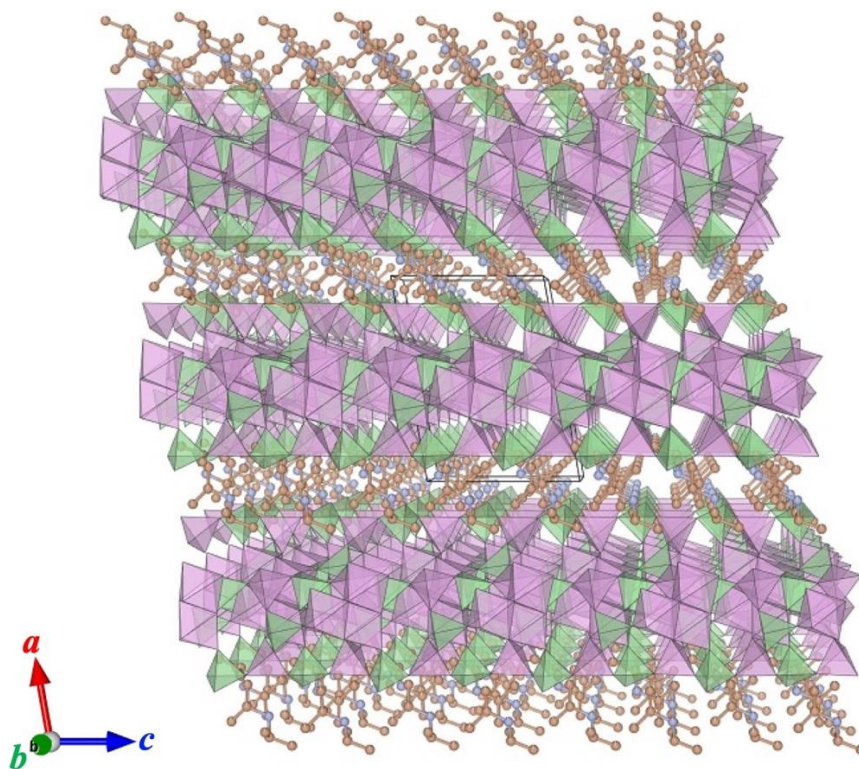

**Fig. S19.** The crystal structure of GAM-7 viewed along the *b*-axis.

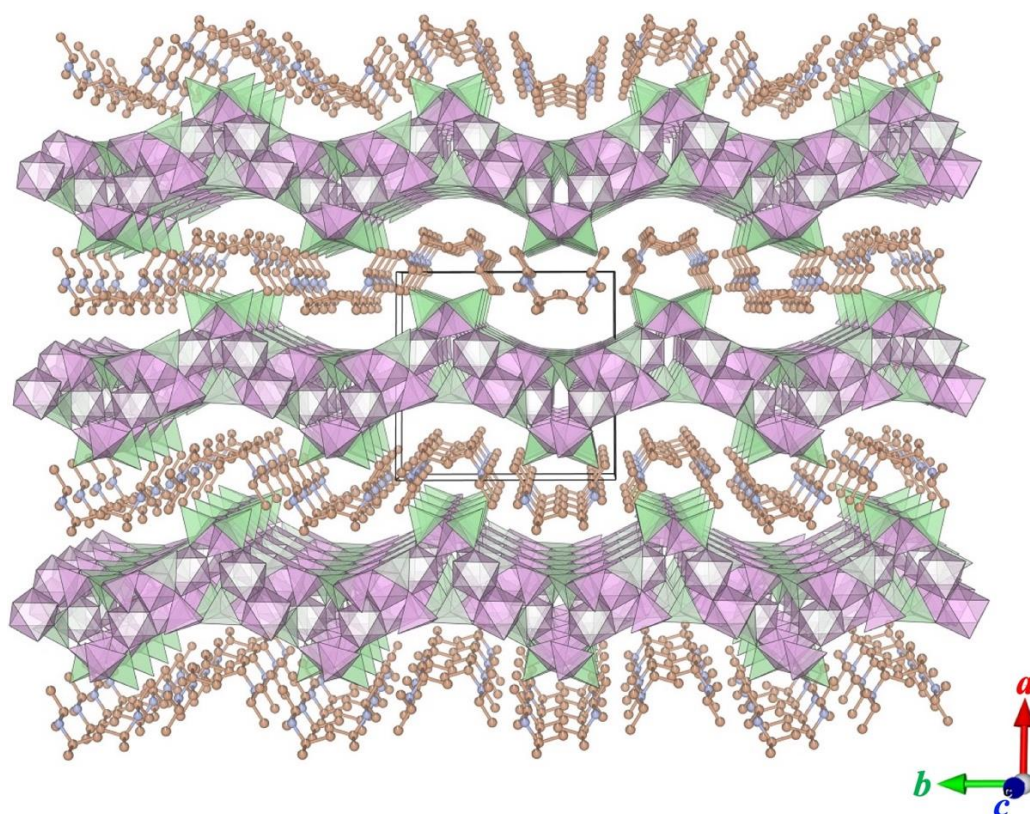

**Fig. S20.** The crystal structure of GAM-7 viewed along the *c*-axis.

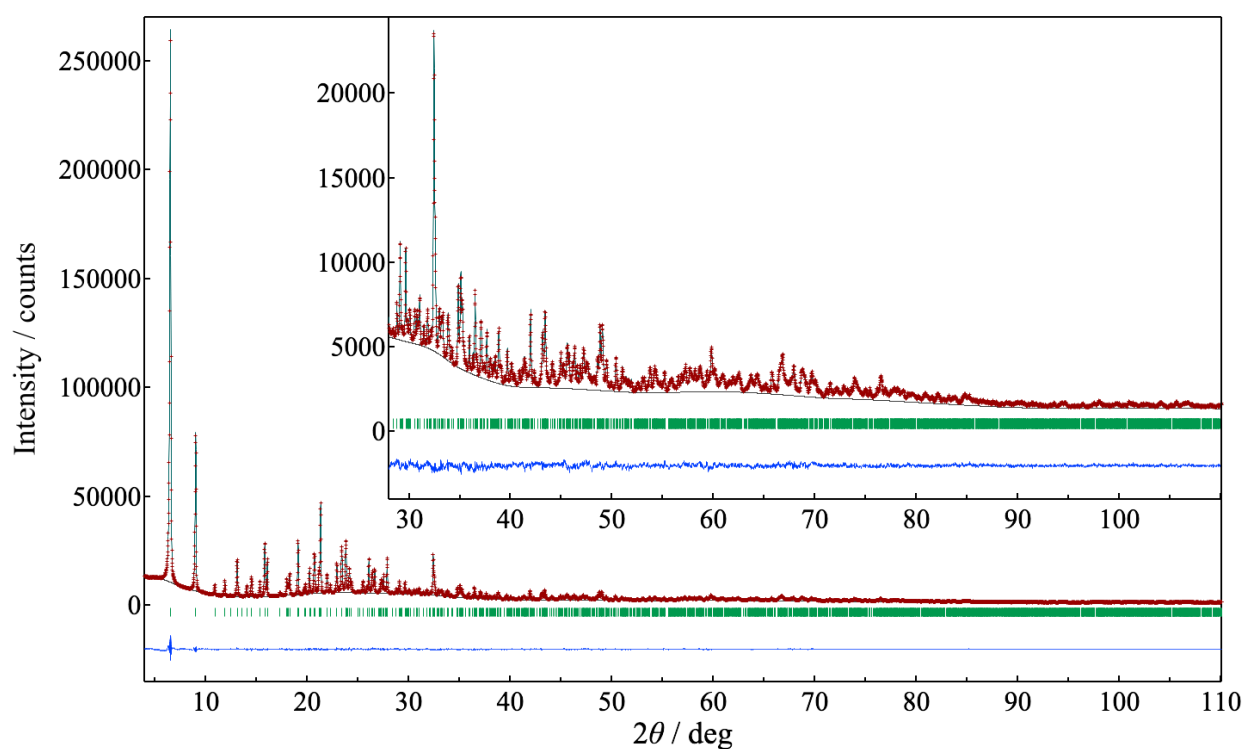

**Fig. S21.** Observed (red crosses), calculated (light blue solid line), and difference (blue) patterns obtained by the Rietveld refinement for GAM-7. Tick marks (green) denote the peak positions of possible Bragg reflections. The inset shows magnified patterns from  $28^\circ$  to  $110^\circ$ .

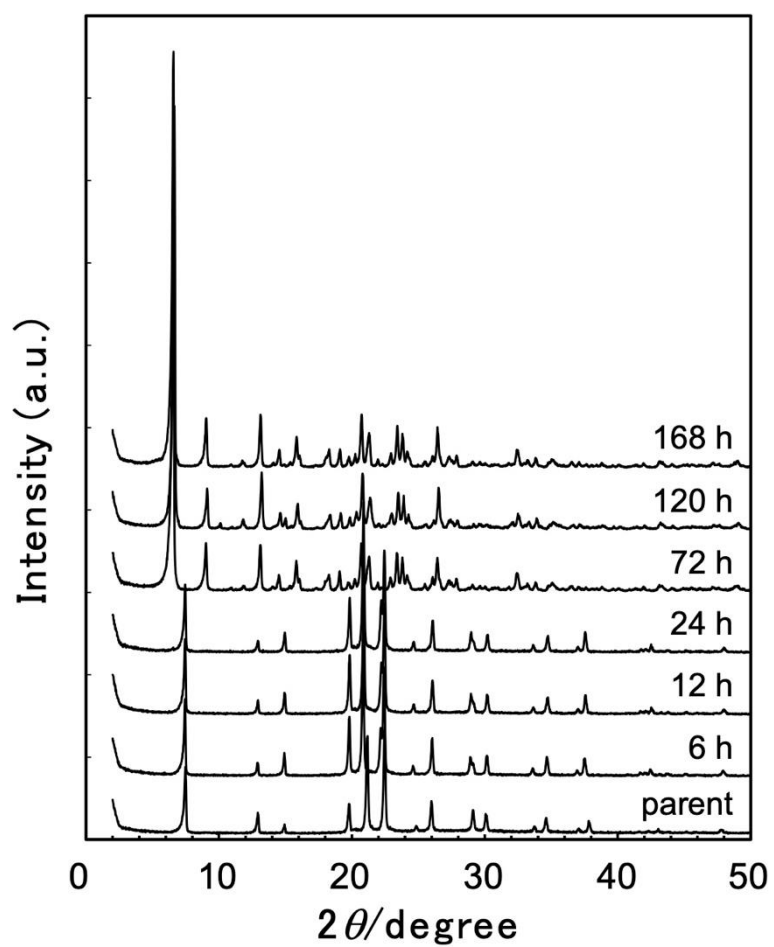

**Fig. S22.** Powder XRD charts during the *izcAP* corresponding to experimental results in Figure 5.
